# Supplementary material for: Rapid binding and release of Hfq from ternary complexes during RNA annealing
Source: PubMed Central journal article supplement — Nucleic Acids Res. 2011 Mar 4;39(12):5193–202. doi: 10.1093/nar/gkr062 (PMC3130257; doi:10.1093/nar/gkr062), 2011-03-04
Supplement: supp_gkr062_Julia_paper3_supplR.pdf [file supp_gkr062_Julia_paper3_supplR.pdf]

SUPPORTING INFORMATION

**Rapid binding and release of Hfq from ternary complexes during RNA annealing**

Julia F. Hopkins, Subrata Panja, and Sarah A. Woodson

Johns Hopkins University, 3400 N. Charles St., Baltimore, MD 21218, USA

FIGURE S1

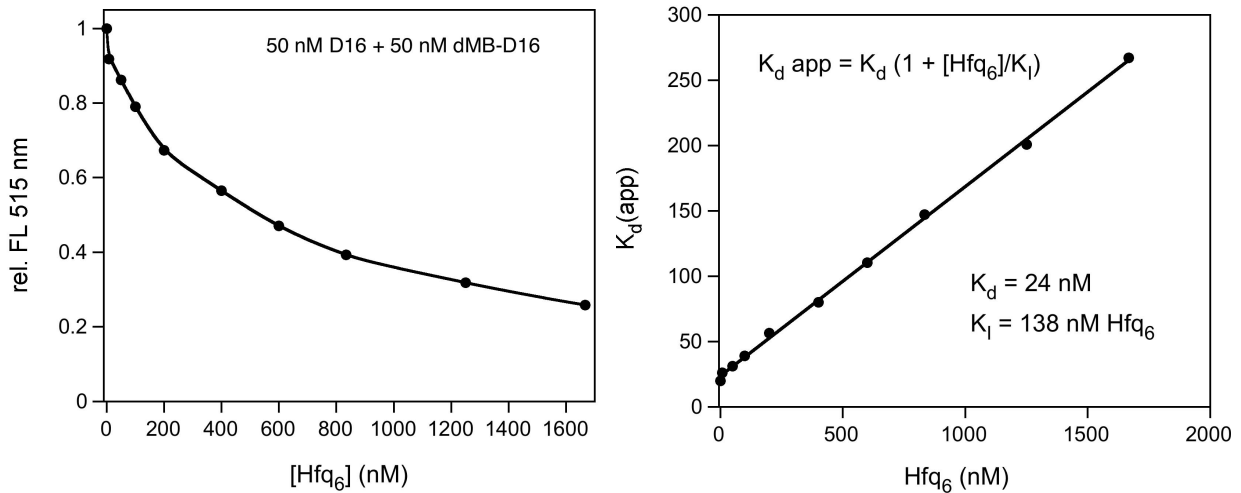

**Figure S1. Effect of Hfq on equilibrium endpoint of RNA-beacon annealing.** Left, 50 nM D16 RNA and 50 nM dMB-D16 beacon were allowed to base pair, and the relative fluorescence intensity of the RNA-beacon duplex measured at 515 nm at equilibrium. Hfq protein was added and samples equilibrated after each addition before the fluorescence was recorded. Right, the concentration of RNA-beacon duplex (DB) and apparent dissociation constant for the duplex were calculated from the change in fluorescence. Plot of  $K_d(\text{app})$  vs.  $[\text{Hfq}_6]$  is consistent with competitive inhibition model. The  $K_d$  obtained from this titration was close to that measured from direct titrations (24 vs 19.6 nM); the  $K_I$  for Hfq is greater than expected based on association of Hfq with single-stranded D16 (138 vs. 23 nM).

FIGURE S2

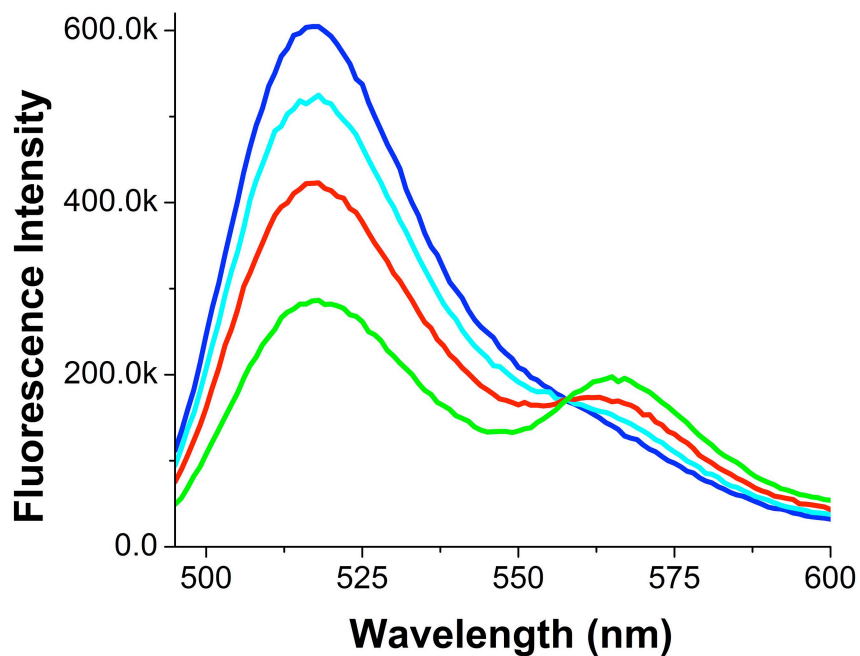

**Figure S2. FRET assay for Hfq-RNA binding.** Fluorescence emission of Hfq-Cy3 and D16-FL RNA complexes, with excitation at 495 nm (Horiba Fluoromax 1.1). D16-FAM (100 nM) was titrated with Hfq-Cy3 in TNK buffer at 30°C, resulting in lower emission at 515 nm (FAM donor) and higher emission at 565 nm (Cy3 acceptor). Hfq monomer concentrations were 0 nM (blue), 248 nM (cyan), 496 nM (red), 1240 nM (green). For stopped-flow experiments, the decrease in FAM emission at 515 nm was measured using a 520 ( $\pm 10$ ) nm band pass filter.

FIGURE S3

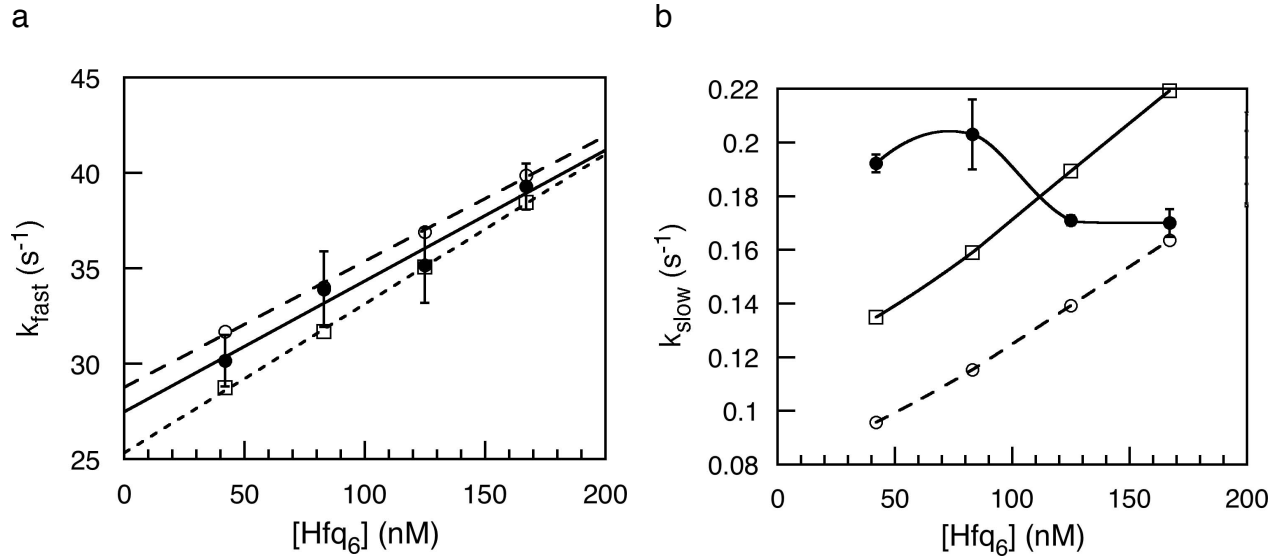

**Figure S3. Hfq-RNA binding kinetics.** Experimental progress curves for binding of 50 nM D16-FL with Hfq-Cy3 were simulated with the mechanism in Scheme I (Berkeley Madonna). (a) Comparison of parameters for fast binding step. Filled circles, experimental values from the linear fit are;  $k_{on}$  ( $k1f$ ) =  $6.9 \cdot 10^7 \text{ M}^{-1}\text{s}^{-1}$ ,  $k1r = 27 \text{ s}^{-1}$ . Open squares, simulation 1:  $k1f = 8.5 \cdot 10^7 \text{ M}^{-1}\text{s}^{-1}$ ,  $k1r = 23 \text{ s}^{-1}$ ,  $k2f = 0.5 \text{ s}^{-1}$ ,  $k2r = 0.05 \text{ s}^{-1}$ ; open squares, simulation 2:  $k1f = 7.0 \cdot 10^7 \text{ M}^{-1}\text{s}^{-1}$ ,  $k1r = 27 \text{ s}^{-1}$ ,  $k2f = 0.5 \text{ s}^{-1}$ ,  $k2r = 0.03 \text{ s}^{-1}$ . (b) Parameters for slow step. Symbols and simulation parameters as in a.

FIGURE S4

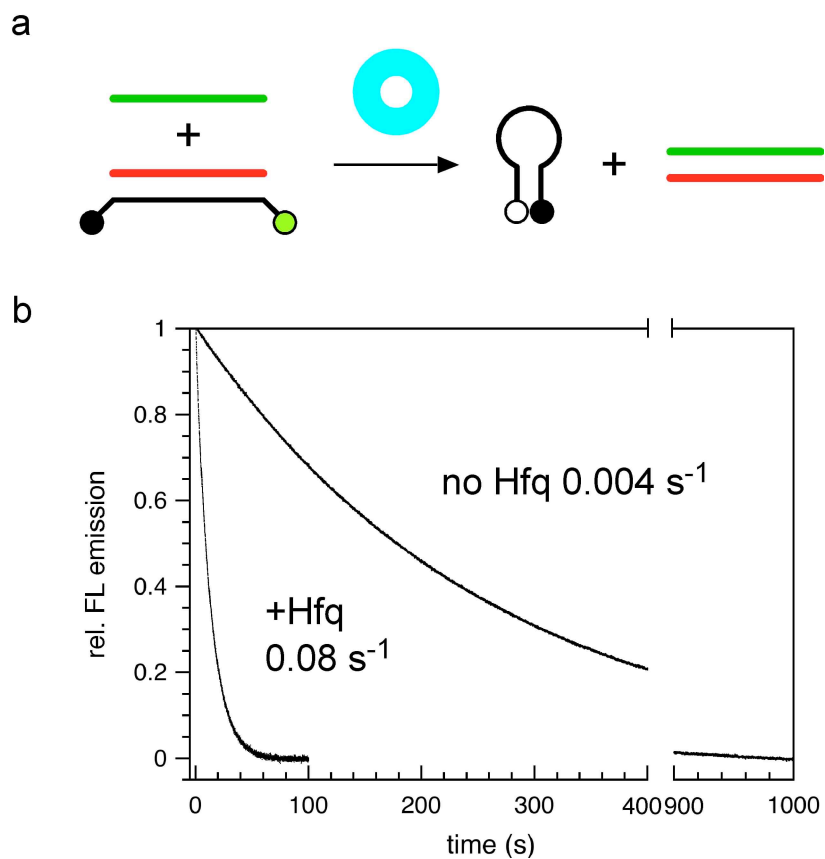

**Figure S4. Hfq accelerates strand exchange.** (a) Rate of strand exchange measured by challenging 50 nM dMB-D16 • D16 RNA complex with 50 nM R16 RNA. (b) Release of the beacon upon exchange with R16 RNA decreases the fluorescence emission. Observed rates were  $0.004 \text{ s}^{-1}$  in the absence of Hfq and  $0.08 \text{ s}^{-1}$  with 50 nM Hfq<sub>6</sub>. Similar results were obtained if Hfq was added to the syringe containing R16 RNA or dMB-D16 • D16 RNA. The strand exchange kinetics is consistent with earlier results in 200 nM Hfq<sub>6</sub> (25).

FIGURE S5

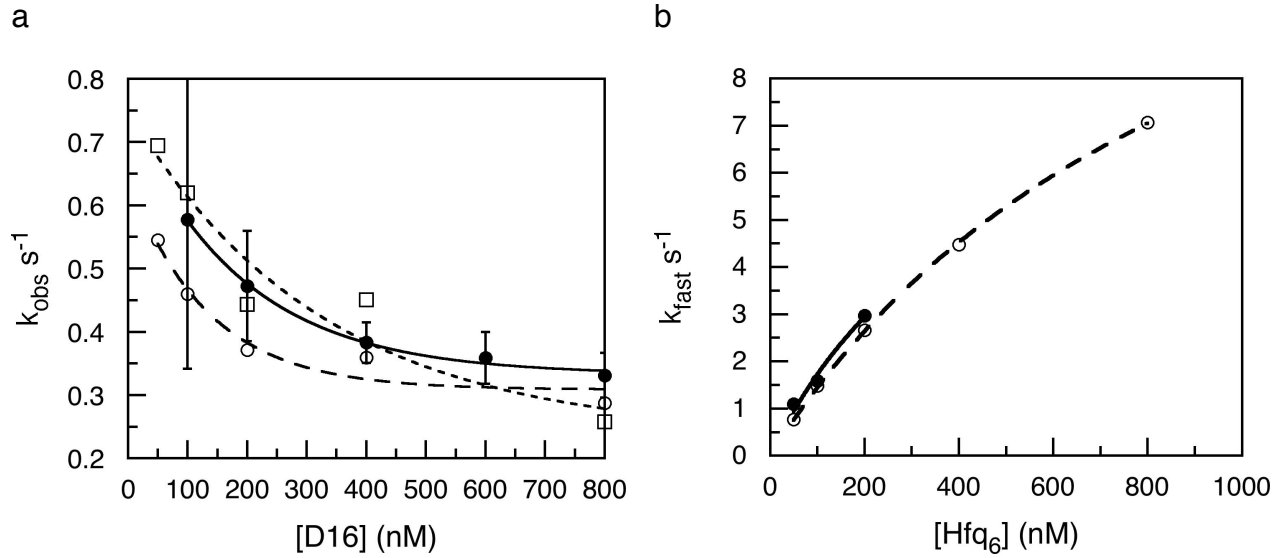

**Figure S5. Simulations of Hfq-dependent RNA annealing kinetics.** Annealing of 50 nM dMB-D16 and D16 RNA in TNK buffer was simulated using the mechanism in Fig. 6. (a) Dependence on D16 RNA, in 50 nM Hfq<sub>6</sub>. Filled circles, experimental data (see Fig. 5); open circles, simulation 1; open squares, simulation 2. (b) Hfq dependence, with 100 nM D16. Rate constants for DH binding were  $k_{1f} = 7.0 \cdot 10^7 \text{ M}^{-1}\text{s}^{-1}$ ,  $k_{1r} = 27 \text{ s}^{-1}$ ,  $k_{2f} = 0.5 \text{ s}^{-1}$ ,  $k_{2r} = 0.05 \text{ s}^{-1}$  (DHs was assumed to be inert). Rate constants for forming the DHD complex were  $k_{3f} = 7.0 \cdot 10^7 \text{ M}^{-1}\text{s}^{-1}$ ,  $k_{3r} = 5.7 \text{ s}^{-1}$ , and forming the ternary complex and Hfq release were  $k_{4f} = 1.0 \cdot 10^8 \text{ M}^{-1}\text{s}^{-1}$ ,  $k_{4r} = 16 \text{ s}^{-1}$ ,  $k_{5f} = 20 \text{ s}^{-1}$ ,  $k_{5r} = 1.0 \cdot 10^7 \text{ M}^{-1}\text{s}^{-1}$ . Final steps of helix zippering or strand dissociation were assumed to be fast. Simulations included the Hfq-independent pathway for annealing,  $k_{on} = 3.4 \cdot 10^4 \text{ M}^{-1}\text{s}^{-1}$ ;  $k_{off} = 6.7 \cdot 10^{-4} \text{ s}^{-1}$ . Parameters for simulation 2 were as above, except  $k_{3r} = 5.0 \text{ s}^{-1}$ ;  $k_{4f} = 1.5 \cdot 10^8 \text{ M}^{-1}\text{s}^{-1}$ ,  $k_{4r} = 22 \text{ s}^{-1}$ .
